# Supplementary material for: Practice guidelines for sedation and analgesia management of critically ill children: a pilot study evaluating guideline impact and feasibility in the PICU
Source: HighWire-hosted journal article supplement (doi:10.1136/bmjopen-2014-006428), 2015-03-01
Supplement: bmjopen-2014-006428supp.pdf [file bmjopen-2014-006428supp.pdf]

# GUIDELINES FOR THE ADMINISTRATION OF SEDATION AND ANALGESIA IN MECHANICALLY VENTILATED CHILDREN

**PURPOSE:**

To outline the management of sedation and analgesia in critically ill children receiving mechanical ventilation.

**BACKGROUND / SUPPORTIVE DATA:**

Sedation and analgesia are necessary components of the care of all critically ill children, especially those requiring mechanical ventilation. The main indications for the use of sedation and analgesia include: to reduce pain and discomfort, to reduce anxiety and agitation, to induce amnesia, to facilitate mechanical ventilation, to prevent the displacement of endotracheal tubes, and to decrease cellular metabolism. The consequences of prolonged use of sedative and analgesic agents in the PICU patient include central nervous system activation, gastrointestinal disturbances, and sympathetic hyperactivity. These signs and symptoms have been related to tolerance and withdrawal phenomena and hold implications for the patient's physical and psychological well being as well as health care costs.

Tolerance is one of the major reported adverse effects associated with continuous benzodiazepine infusions. Tolerance may be defined as a decrease in the effectiveness of a drug after prolonged use or as the requirement of larger doses to achieve the same effect. This phenomenon is due to an adaptation of neuronal cells and not a change of metabolism of the drug. One method of addressing this adverse effect, drug tolerance, is to recognise its occurrence and introduce alternative sedation agents titrated to an accepted sedation level.

A second adverse effect of the prolonged use of analgesic and sedation agents is withdrawal or abstinence syndrome. In paediatric patients, withdrawal syndrome is due to the development of tolerance to sedation and analgesic drugs not dependence or addiction. Studies have shown a strong positive correlation between large total doses of midazolam and the occurrence of withdrawal symptoms. Local, national and international audits have all shown that drug tapering is conducted in very few patients and that most patients have their sedation and analgesic agents abruptly discontinued. Thus, the incidence of withdrawal symptoms may be related to the infrequent tapering of sedation and analgesic agents.

There exists a plethora of literature discussing the adverse effects of sedation and analgesia in the critical care environment, particularly its prolonged use. There appears to be a consensus about the need and benefits of a systematic and coordinated approach to sedation administration, tapering and titration in the PICU.

**SUMMARY OF SEDATION ALGORITHM:**

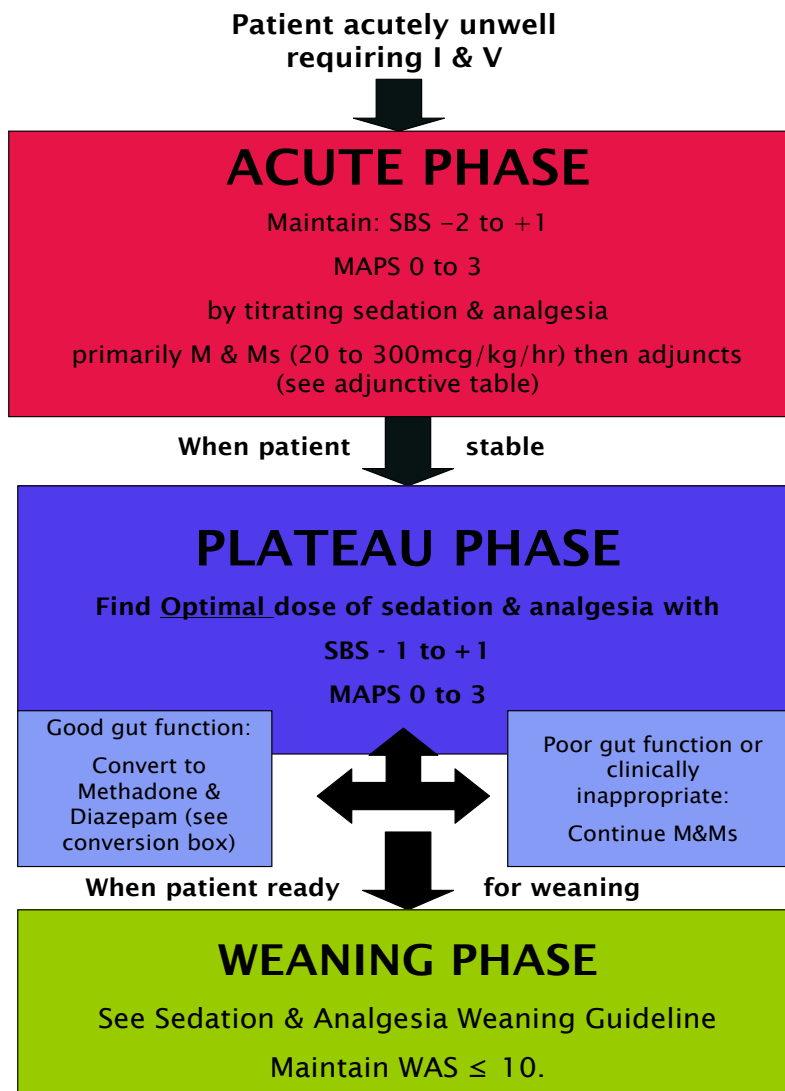

**EVIDENTIARY TABLE:**

| Strategy                    | Evidence                                                                                                                                                                           |
|-----------------------------|------------------------------------------------------------------------------------------------------------------------------------------------------------------------------------|
| Use of protocol             | The use of protocol directed sedation can reduce the duration of mechanical ventilation, ICU and hospital stay and can result in safe, cost-effective improvements. <sup>1-5</sup> |
| SBS – Sedation Scale        | Reliable and valid scale for use in paediatric critical care. <sup>6-8</sup>                                                                                                       |
| PICU MAPS – Pain Scale      | Reliable and valid scale for use in paediatric critical care, particularly pre-verbal children. <sup>9-12</sup>                                                                    |
| Withdrawal Assessment Scale | Combination of validated tool and Great Ormond Street Hospital protocol <sup>13-18</sup>                                                                                           |
| Accumulative dose           | Up to 300 mcg/kg/hr for Midazolam                                                                                                                                                  |
| Weaning timeframes          | <sup>13, 19</sup>                                                                                                                                                                  |
| Mandatory review            | <sup>20</sup>                                                                                                                                                                      |
| Conversion to oral drugs    | Diazepam, Methadone <sup>24-26</sup>                                                                                                                                               |

**SUGGESTED PHARMACOLOGICAL TREATMENT OF PROCEDURAL PAIN AND DISCOMFORT:**

| Drug Group                              | Drug                                | Indications                                                                                                             | Evidence          |
|-----------------------------------------|-------------------------------------|-------------------------------------------------------------------------------------------------------------------------|-------------------|
| Topical Local Anaesthetic               | Angel Cream<br>EMLA                 | PIV/IAL insertion<br>Venepuncture<br>Arterial Stab<br>Portacath access<br>Lumbar puncture*<br>CVL/ICC insertion*        | <sup>1-5</sup>    |
|                                         | Lignocaine 2% & Chlorhexidine 0.05% | IDC insertion                                                                                                           | <sup>6, 7</sup>   |
|                                         | Lignocaine 4%                       | Bronchoscopy*                                                                                                           | <sup>8, 9</sup>   |
| Sub-cutaneous injection                 | Lignocaine 1%                       | ICC/CVL insertion*                                                                                                      | <sup>2</sup>      |
| Disassociative Agent                    | Ketamine                            | CVL/ICC insertion<br>Gastroenterology procedure<br>Bronchoscopy<br>Bone marrow aspiration<br>Wound management procedure | <sup>10, 11</sup> |
| Short acting anaesthetic agent          | Propofol                            | CVL/ICC insertion<br>Gastroenterology procedure<br>Bronchoscopy<br>Bone marrow aspiration                               | <sup>10, 12</sup> |
| Short acting sedative & analgesic agent | Morphine & Midazolam                | ETT Suctioning<br>Movement/Position change                                                                              | <sup>30</sup>     |

\* used in conjunction with other drugs

**SUGGESTED NON-PHARMACOLOGICAL MEASURES FOR OPTIMISING PATIENT COMFORT**

| Treatment                                                                     | Evidence              |
|-------------------------------------------------------------------------------|-----------------------|
| Positioning & body support                                                    | <sup>13-16</sup>      |
| Reassurance by staff and/or parents                                           | <sup>14</sup>         |
| Minimise discomfort of invasive devices (e.g. ETT, CVLs, and drainage tubes). | <sup>14</sup>         |
| Optimise hydration, nutrition, essential cares (e.g. mouth, eye).             | <sup>17-19</sup>      |
| Massage, or rocking                                                           | <sup>20, 21</sup>     |
| Swaddling                                                                     | <sup>22-24</sup>      |
| Non-nutritive sucking                                                         | <sup>25-27</sup>      |
| Decrease external stimuli (noise, light, movement or handling)                | <sup>15, 28, 29</sup> |
| Music therapy                                                                 | <sup>20</sup>         |

**SUGGESTED ADJUNCTIVE PHARMACOLOGICAL THERAPIES FOR MAXIMISING PATIENT COMFORT**

| Drug            | Approach                                                                        | Evidence                  |
|-----------------|---------------------------------------------------------------------------------|---------------------------|
| Propofol        | 2.5-3.5mg/kg stat then 7.5-15mg/kg/hr <sup>30</sup> ; 4-6mg/kg/hr <sup>31</sup> | <sup>30-34</sup>          |
| Morphine        | 20mcg/kg prn                                                                    | <sup>30</sup>             |
| Midazolam       | 20mcg/kg prn                                                                    | <sup>30</sup>             |
| Ketamine        | 1mg/kg/hr                                                                       | <sup>30, 32, 33, 35</sup> |
| Chloral Hydrate | 25mg/kg q6h <sup>36</sup> maximum 5g                                            | <sup>35, 36</sup>         |
| Fentanyl        | If allergic or renal failure 5-10mcg/kg/hr                                      | <sup>30, 34, 35</sup>     |
| Promethazine    | Oral 0.5mg/kg q6h Maximum 1mg/kg                                                | <sup>37</sup>             |
| Chlorpromazine  | 0.25-1mg/kg/q6-8h                                                               |                           |
| Clonidine       | 3-5mcg/kg q8h                                                                   | <sup>30, 35, 36, 38</sup> |
| Haloperidol     | 0.1mg/kg- 0.1mg/kg q12h                                                         | <sup>39</sup>             |
| Phenobarb       | 5mg/kg/day                                                                      | <sup>36</sup>             |
| Paracetamol     | 90mg/kg/24hrs- accumulation in hepatotoxic in pts with impaired LF-             | <sup>30</sup>             |
| Codeine         | Max 1mg/kg/dose                                                                 | <sup>30</sup>             |
| Ibuprofen       | 10mg/kg q6h Precautions- asthma, renal impairment, under 6mths                  | <sup>30</sup>             |

## REFERENCES - PROTOCOL

1. Alexander E, Carnevale FA, Razack S. Evaluation of a sedation protocol for intubated critically ill children. *Intensive and Critical Care Nursing* 2002;18(5):292-301.
2. Brook AD, Ahrens TS, Schaiff R, Prentice D, Sherman G, Shannon W, et al. Effect of a nursing-implemented sedation protocol on the duration of mechanical ventilation. *Crit Care Med* 1999;27(12):2609-15.
3. Brattebo G, Hofoss D, Flaatten H, Muri AK, Gjerde S, Plsek PE. Effect of a scoring system and protocol for sedation on duration of patients' need for ventilator support in a surgical intensive care unit. *Quality & Safety In Health Care* 2004;13(3):203-205.
4. Mascia MF, Koch M, Medicis JJ. Pharmacoeconomic impact of rational use guidelines on the provision of analgesia, sedation, and neuromuscular blockade in critical care. *Crit Care Med* 2000;28(7):2300-6.
5. McKinley S. A nursing-implemented sedation protocol and the duration of mechanical ventilation. *Australian Critical Care: Official Journal Of The Confederation Of Australian Critical Care Nurses* 2000;13(2):72-74.
6. Clemmer TP, Wallace JC, Spuhler VJ, Bailey PP, Devlin JW. Origins of the Motor Activity Assessment Scale score: a multi-institutional process. *Critical Care Medicine* 2000;28(8):3124.
7. Curley MAQ, Harris SK. State Behavioural Scale: A Sedation Instrument for Ventilated Infants and Young Children. In: *American Thoracic Society Scientific Meeting Conference Proceedings*; 2005 23 May; San Diego; 2005. p. A557.
8. Devlin JW, Boleski G, Mlynarek M, Nerenz DR, Peterson E, Jankowski M, et al. Motor Activity Assessment Scale: a valid and reliable sedation scale for use with mechanically ventilated patients in an adult surgical intensive care unit. *Critical Care Medicine* 1999;27(7):1271-1275.
9. Ramelet AS. Assessment of pain and agitation in critically ill infants. *Australian Critical Care: Official Journal Of The Confederation Of Australian Critical Care Nurses* 1999;12(3):92-96.
10. Ramelet AS, Bulsara M, Abu-Saad HH, McDonald S, Rees N. Development of a clinical-based pain measure for the critically ill infant. In: *8th World Congress of Intensive and Critical Care Medicine*; 2001; Sydney; 2001.
11. Ramelet AS, Abu-Saad HH, Bulsara M, Rees N, McDonald S. The Multidimensional Assessment of Pain Scale (Part II): Clinical validation in preverbal children. Unpublished manuscript: submitted.
12. Ramelet AS, Abu-Saad HH, Bulsara M, Rees N, McDonald S. The Multidimensional Assessment of Pain Scale (Part I): Development and preliminary psychometric testing in preverbal children. Unpublished manuscript: submitted.
13. Directorate C, Service PC, Studies CsNR. Protocol for weaning Opioids and Benzodiazepines. London: Great Ormond Street Hospital; 2000.
14. Finnegan LP, Connaughton JF, Jr, Kron RE, Emich JP. Neonatal abstinence syndrome: assessment and management. *Addictive Diseases* 1975;2(1-2):141-158.
15. Kahn EJ, Neumann LL, Polk GA. The course of the heroin withdrawal syndrome in newborn infants treated with phenobarbital or chlorpromazine. *The Journal Of Pediatrics* 1969;75(3):495-500.
16. Naughton I. Opioid Weaning Flowsheet. Oakland: Children's Hospital Oakland; 2000.
17. Franck L, Vilardi J. Assessment and management of opioid withdrawal in ill neonates. *Neonatal Network: NN* 1995;14(2):39-48.
18. Franck LS, Vilardi J, Durand D, Powers R. Opioid withdrawal in neonates after continuous infusions of morphine or fentanyl during extracorporeal membrane oxygenation. *American Journal Of Critical Care: An Official Publication, American Association Of Critical-Care Nurses* 1998;7(5):364-369.
19. Dhanani S, Dodds A, Duggan M, Sinclair M, Vanhuysse J, Wong K. The Prevention and Treatment of Opioid and Benzodiazepine Withdrawal. Philadelphia: Philadelphia Children's Hospital; 2002.
20. Dodson B, Curley MAQ. Designing a nurse-implemented sedation algorithm for use in a pediatric intensive care unit - A preliminary report. In: *4th World Congress on Pediatric Intensive Care*; 2003 12 June; Boston, Massachusetts, USA; 2003. p. 126.
21. Tobias JD. Tolerance, withdrawal, and physical dependency after long-term sedation and analgesia of children in the pediatric intensive care unit. *Crit Care Med* 2000;28(6):2122-32.
22. Lugo RA, Chester EA, Cash J, Grant MC, Vernon DD. A cost analysis of enterally administered lorazepam in the paediatric intensive care unit. *Critical Care Medicine*. 1999;27(2):417-421.
23. Cigada M, Pezzi A, Di Mauro P, Marzorati S, Noto A, Valdambri F, et al. Sedation in the critically ill ventilated patient: possible role of enteral drugs. *Intensive Care Medicine* 2005;31:482-486.
24. Yaster M, Kost-Byerly S, Berde C, Billet C. The management of opioid and benzodiazepine dependence in infants, children, and adolescents. *Pediatrics* 1996;98(1):135-140.
25. DRUGDEX. In: Thomson, editor. *MICROMEDEX*. Vol. 124 ed; 1974-2005.
26. Tobias JD. Sedation and analgesia in paediatric intensive care units: a guide to drug selection and use. *Paediatric Drugs* 1999;1(2):109-126.

## REFERENCES - SEDATION

1. Bishai R, Taddio A, Bar-Oz B, Freedman MH, Koren G. Relative efficacy of amethocaine gel and lidocaine-prilocaine cream for Port-a-Cath puncture in children. *Pediatrics* 1999;104(3):e31.
2. Gunter JB. Benefit and risks of local anesthetics in infants and children. *Paediatric Drugs* 2002;4(10):649-672.
3. Miser AW, Goh TS, Dose AM, O'Fallon JR, Niedringhaus RD, Betcher DL, et al. Trial of a topically administered local anesthetic (EMLA cream) for pain relief during central venous port accesses in children with cancer. *Journal Of Pain And Symptom Management* 1994;9(4):259-264.
4. O'Brien L, Taddio A, Lyszkiewicz DA, Koren G. A critical review of the topical local anesthetic amethocaine (Ametop) for pediatric pain. *Paediatric Drugs* 2005;7(1):41-54.
5. Taddio A, Gurguis M, Koren G. Lidocaine-prilocaine cream versus tetracaine gel for procedural pain in children. *The Annals of Pharmacotherapy* 2002;36:687-92.
6. Tanabe P, Steinmann R, Anderson J, Johnson D, Metcalf S, Ring-Hurn E. Factors affecting pain scores during female urethral catheterization. *Academic Emergency Medicine: Official Journal Of The Society For Academic Emergency Medicine* 2004;11(6):699-702.
7. Gerard LL, Cooper CS, Duethman KS, Gordley BM, Kleiber CM. Effectiveness of lidocaine lubricant for discomfort during pediatric urethral catheterization. *The Journal Of Urology* 2003;170(2, Part 1):564-567.
8. Stolz D, Chhajed PN, Leuppi JD, Brutsche M, Pflimlin E, Tamm M. Cough suppression during flexible bronchoscopy using combined sedation with midazolam and hydrocodone: a randomised, double blind, placebo controlled trial. *Thorax* 2004;59(9):773-776.
9. Milman N, Laub M, Munch EP, Angelo HR. Serum concentrations of lignocaine and its metabolite monoethylglycinexylidide during fibre-optic bronchoscopy in local anaesthesia. *Respiratory Medicine* 1998;92(1):40-43.
10. Vardi A, Salem Y, Padeh S, Paret G, Barzilay Z. Is propofol safe for procedural sedation in children? A prospective evaluation of propofol versus ketamine in pediatric critical care. *Critical Care Medicine* 2002;30(6):1231-1236.
11. Green SM, Denmark TK, Cline J, Roghair C, Abd Allah S, Rothrock SG. Ketamine sedation for pediatric critical care procedures. *Pediatric Emergency Care* 2001;17(4):244-248.
12. Barbi E, Gerarduzzi T, Marchetti F, Neri E, Verucci E, Bruno I, et al. Deep sedation with propofol by nonanesthesiologists: a prospective pediatric experience. *Archives Of Pediatrics & Adolescent Medicine* 2003;157(11):1097-1103.
13. Oehler JM, Hannan T, Catlett A. Maternal views of preterm infants' responsiveness to social interaction. *Neonatal Network: NN* 1993;12(6):67-74.
14. Stephens BK, Barkey ME, Hall HR. Techniques to comfort children during stressful procedures. *Accident and Emergency Nursing* 1999;7(4):226-36.
15. Jorgensen KM. *Developmental Care of the Premature Infant: A Concise Overview*. Weymouth: Developmental Care Division of Children's Medical Ventures; 1993.
16. Young J. *Developmental Care of the Premature Baby*. London: Bailliere Tindall; 1996.
17. Burns SM. Weaning from long-term mechanical ventilation. *AACN Clinical Issues in Critical Care Nursing* 1991;2(3):359-473.
18. Burns SM, Burns JE, Truitt JD. Comparison of five clinical weaning indices. *American Journal of Critical Care* 1994;3(5):342-352.
19. Burns SM, Clochesy JM, Hanneman SKG. Weaning from long-term mechanical ventilation. *American Journal of Critical Care* 1995;4(1):4-22.
20. Keegan L. Therapies to reduce stress and anxiety. *Critical Care Nursing Clinics of North America* 2005;15(3):321-7.
21. Harrison LL, Williams AK, Berbaum ML, Stem JT, Leeper J. Physiologic and behavioural effects of gentle human touch on preterm infants. *Research in Nursing and Health* 2000;23(6):435-46.
22. Huang C, Tung W, JKuo L, Chang Y. Comparisons of pain responses of premature infants to heelstick injury between containment and swaddling. *Journal of Nursing Research* 2004;12(1):31-40.
23. Corff KE, Seideman R, Venkataraman PS, Lutes L, Yates B. Facilitated tucking: a nonpharmacologic comfort measure for pain in preterm neonates. *Journal of Obstetric, Gynecologic, and Neonatal Nursing* 1995;24(2):143.
24. Ohgi S, Akiyama T, Arisawa K, Shigemori K. Randomised controlled trial of swaddling versus massage in the management of excessive crying in infants with cerebral injuries. *Archives of Disease in Childhood* 2004;89(3):212-6.
25. Pickler RH, Reyna BA. Effects of non-nutritive sucking on nutritive sucking, breathing, and behaviour during bottle feedings of preterm infants. *Advances in Neonatal Care* 2004;4(4):226-34.
26. Pinelli J, Symington A. Non-nutritive sucking for promoting physiologic stability and nutrition in preterm infants. *The Cochrane Database of Systematic Reviews* 2001.
27. Stevens B, Yamada J, Ohlsson A. Sucrose for analgesia in newborn infants undergoing painful procedures. *The Cochrane Database of Systematic Reviews* 2004.
28. Oehler JM. Developmental care of low birth weight infants. *Nursing Clinics of North America* 1993;28(2):289-301.
29. Walden M, Sudia-Robinson T, Carrier CT. Comfort care of infants in the neonatal intensive care unit at end of life. *Newborn and Infant Nursing Reviews* 2001;1(2):97-105.
30. Shann F. *Drug Doses*. 12th ed. Victoria: Collective Pty Ltd; 2003.
31. Rigby-Jones AE, Nolan JA, Priston MJ, Wright PMC, Sneyd JR, Wolf AR. Pharmacokinetics of propofol infusions in critically ill neonates, infants, and children in an intensive care unit. *Anesthesiology* 2002;97(6):1393-1400.
32. Tobias JD, Martin LD, Wetzel RC. Ketamine by continuous infusion for sedation in the pediatric intensive care unit. *Critical Care Medicine* 1990;18(8):819-821.
33. Seigler R, Avant M, Gwyn M, Lynch A, Golding E, Blackhurst D, et al. A comparison of propofol and ketamine/midazolam for intravenous sedation of children. *Pediatric Critical Care Medicine* 2001;2(1):20-23.
34. Burns AM, Shelly MP, Park GR. The use of sedative agents in critically ill patients. *Drugs* 1992;43(4):507-515.
35. Tobias JD. Sedation and analgesia in paediatric intensive care units: a guide to drug selection and use. *Paediatric Drugs* 1999;1(2):109-126.
36. Dhanani S, Dodds A, Duggan M, Sinclair M. The prevention and treatment of opioid and benzodiazepine withdrawal: Princess Margaret Hospital for Children; 2002.
37. Parkinson L, Hughes J, Gill A, Billingham I, Ratcliffe J, Choonara I. A randomized controlled trial of sedation in the critically ill. *Paediatric Anaesthesia* 1997;7:405-410.
38. Arenas-Lopez S, Riphagen S, Tibby SM, Durward A, Tomlin S, Davies G, et al. Use of oral clonidine for sedation in ventilated paediatric intensive care patients. *Intensive Care Medicine* 2004;30(8):1625-1629.
39. Brown R, Henke A, Greenhalgh D, Warden G. The use of haloperidol in the agitated, critically ill pediatric burn patient. *Journal of Burn Care and Rehabilitation* 1996;17(1):34-38.
40. Curley MAQ, Molengraaf JA. Providing comfort to critically ill pediatric patients: Isoflurane. *Critical Care Nursing Clinics of North America* 1995;7(2):267-274.
