# Supplementary material for: Practice guidelines for sedation and analgesia management of critically ill children: a pilot study evaluating guideline impact and feasibility in the PICU
Source: HighWire-hosted journal article supplement (doi:10.1136/bmjopen-2014-006428), 2015-03-01

## Acute Phase

### DEFINITION:

Acutely unwell, new admission, expectation that illness/injury will worsen, potentially unstable where poor levels of sedation would be detrimental to patient.

Eg. Raised ICP, onset of oscillation, return from OT.

### GOALS:

Sedation: SBS -2 to -1

Pain: MAPS 0 to 3

### DO NOT USE GUIDELINE IF PATIENT IS:

- Admitted for management of seizure activity
- < 1 year of age,
- has underlying renal impairment
- has a metabolic condition

START HERE

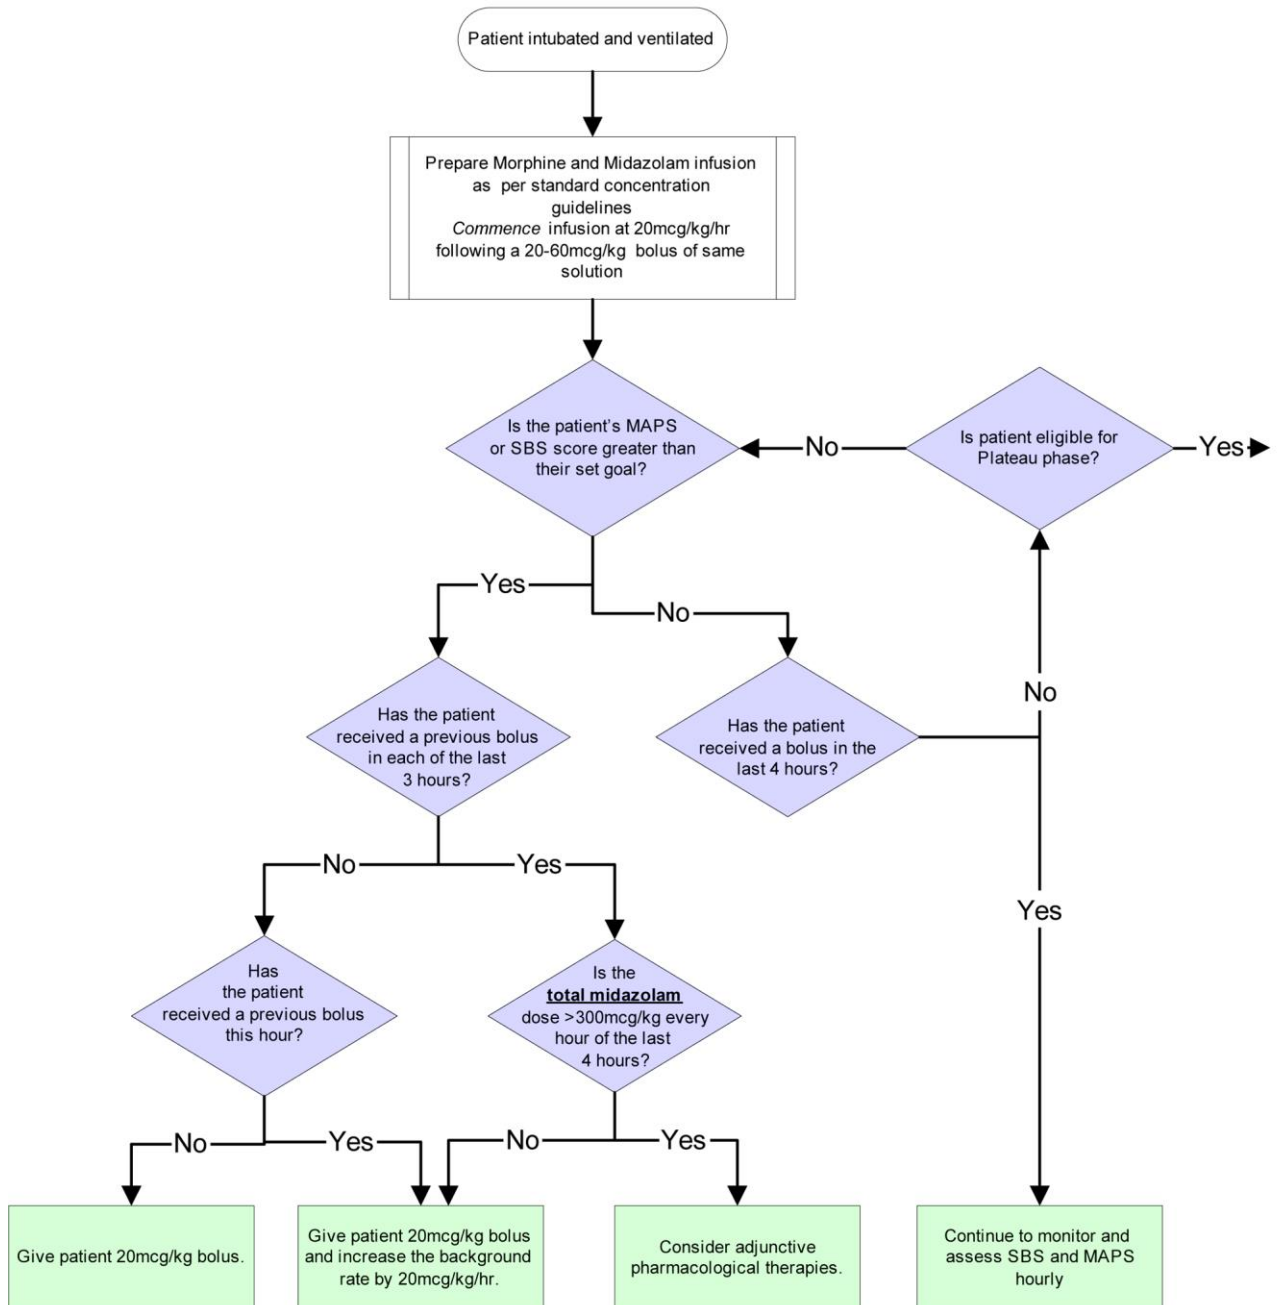

Supplement: bmjopen-2014-006428supp_AcutePhase.pdf [file bmjopen-2014-006428supp_AcutePhase.pdf]
