# Supplementary material for: Practice guidelines for sedation and analgesia management of critically ill children: a pilot study evaluating guideline impact and feasibility in the PICU
Source: HighWire-hosted journal article supplement (doi:10.1136/bmjopen-2014-006428), 2015-03-01
Supplement: bmjopen-2014-006428supp_PlateauPhase.pdf [file bmjopen-2014-006428supp_PlateauPhase.pdf]

## Plateau Phase

### DEFINITION:

Patient stable, acute treatments completed, illness/injury has reached it's peak.  
Eg. Sepsis resolving, stabilised ventilatory requirements, HI being rewarmed.

### GOALS:

Sedation: SBS -1 to +1  
Pain: MAPS 0 to 3

\* When titrating the IV infusion, 10% of original dose means 10% of infusion rate when first reduction made.  
If patient returns to theatre whilst in the plateau phase, return to Acute Phase.

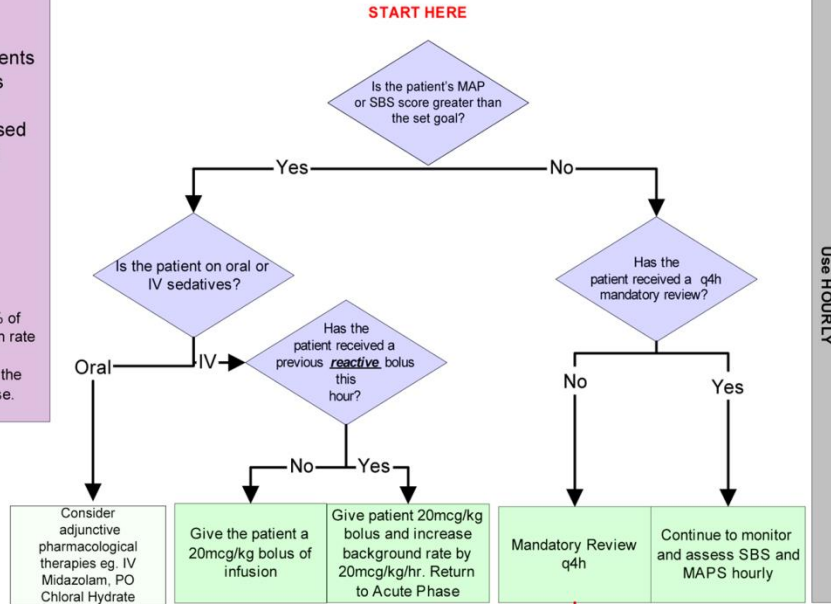

Use HOURLY

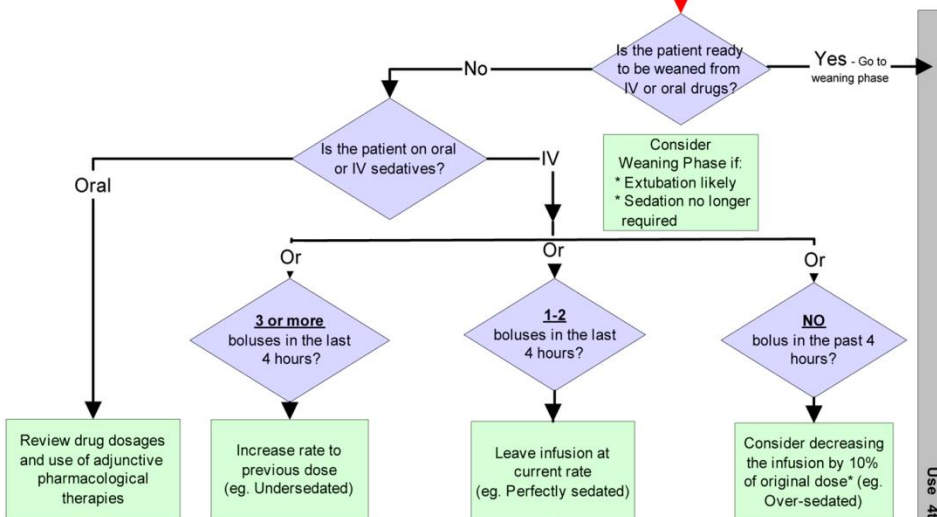

Use 4h HOURLY

**Consider amount of adjunct therapies also being used ie. Chloral Hydrate, Clonidine etc. prior to conversion.**

**IV Midazolam to Oral Diazepam Conversion**  
Total mg/24hrs of IV midazolam (incl boluses)divided by 2 = Total mg/24hr of PO diazepam (initially divided q6h, then b.d.) Maximum diazepam dose SHOULD NOT EXCEED 0.1mg/kg/dose (total =40mg/day).

**IV Morphine to Oral Methadone Conversion**  
Total mg/24hrs of IV morphine (incl boluses)times by 1 = Total mg/24hrs of PO methadone (initially divided q6h, then b.d.) Maximum methadone dose SHOULD NOT EXCEED 0.2mg/kg/dose (total =80mg/day)

Alternate/stagger Diazepam and Methadone administration times.

**Conversion from IV to Oral Sedatives and Analgesics**  
Decrease IV morphine & midazolam by 50% with second dose of methadone & diazepam.  
Discontinue IV morphine & midazolam withthird dose of methadone & diazepam.

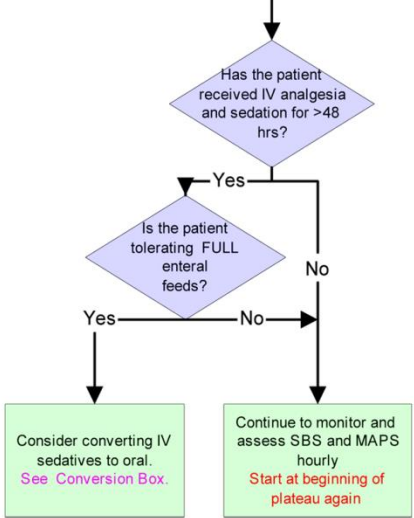

Use 4h HOURLY
